# Supplementary material for: A fluorescent all-fluorene polyazomethine—towards soluble conjugated polymers exhibiting high fluorescence and electrochromic properties
Source: Royal Society of Chemistry journal article supplement (doi:10.1039/c0py00394h), 2011-01-01
Supplement: c0py00394h.pdf [file c0py00394h.pdf]

**A Fluorescent All-Fluorene Polyazomethine – Towards Soluble Conjugated Polymers  
Exhibiting High Fluorescence and Electrochromic Properties**

Satyananda Barik and W. G. Skene\*

Laboratoire de caractérisation photophysique des matériaux conjugués  
Department of Chemistry, Pavillon JA Bombardier,  
University of Montreal, CP 6128, succ. Centre-ville,  
Montreal, Quebec, Canada H3T 2B1

Corresponding author : [w.skene@umontreal.ca](mailto:w.skene@umontreal.ca)

### TABLE OF CONTENTS

|                                                                                                                                                                                                                                           |   |
|-------------------------------------------------------------------------------------------------------------------------------------------------------------------------------------------------------------------------------------------|---|
| Figure 1. $^1\text{H}$ NMR spectrum of 6 in $\text{CDCl}_3$ .....                                                                                                                                                                         | 4 |
| Figure 2. Absorbance spectra of 6 (●), oxidized with $\text{FeCl}_3$ (■), followed by neutralization with hydrazine hydrate (□) in dichloromethane.....                                                                                   | 5 |
| Figure 3. Fluorescence spectra of 6 at room temperature (red) and 77 K (black) in 2-methylcyclohexane. ....                                                                                                                               | 6 |
| Figure 4. Fluorescence spectra of 6 at room temperature (black) and protonated (red) in 2-methylcyclohexane. ....                                                                                                                         | 7 |
| Figure 5. Photographs of 6 in dichloromethane (left) with: A) $\text{FeCl}_3$ added (middle) followed by the addition of hydrazine hydrate (right) and B) with the addition of TFA (middle) followed by the addition of TEA (right). .... | 8 |

The syntheses of the monomers required for preparing the alternating copolymer **6** are outlined in Scheme 1. Commercially available fluorene was alkylated with 1-bromohexane, followed by nitration in refluxing nitric acid. The mixture of mono- and dinitrated derivatives was separated and each nitro-derivative was separately reduced to afford the corresponding aminofluorene **1** and **2**, respectively, by catalytic reduction with Pd/C and hydrazine monohydrate. The dialdehyde **3** was prepared from the corresponding 2,7-dibromo-9,9-dioctylfluorene, using butyl-lithium in a mixture of DMF in THF according to known methods.<sup>17</sup> Meanwhile, the monoaldehyde **4** was prepared from 2-bromofluorene that was alkylated with 1-bromohexane with 50 % NaOH followed by standard formylation with butyl-lithium and THF/DMF.

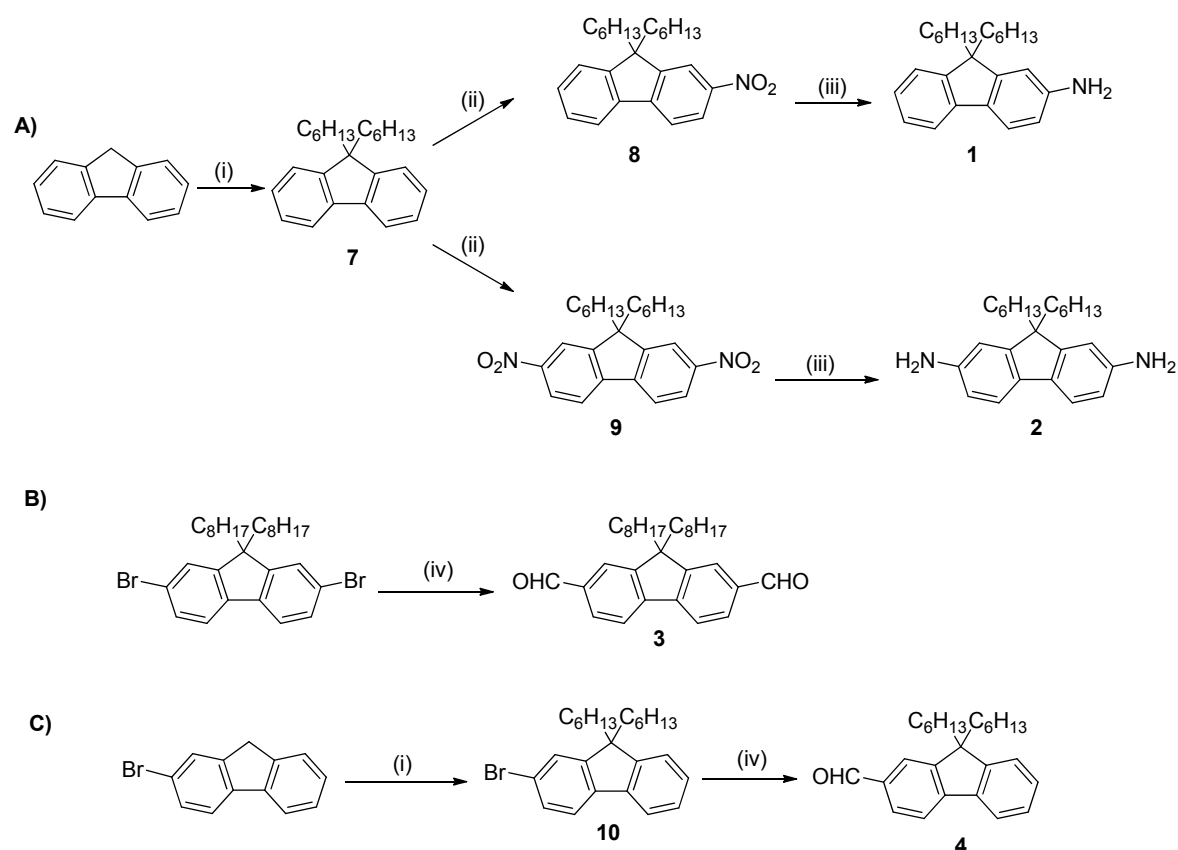

**Scheme 1.** Synthetic route for monomers: (i) 1-bromohexane, 50 % NaOH in DMSO room temperature, 4 days; (ii) HNO<sub>3</sub>, reflux, 2h; (iii) 10% Pd/C reflux THF/EtOH followed by hydrazine monohydrate, room temperature, overnight; (iv) BuLi, -78 °C, THF followed by DMF, room temperature, overnight.

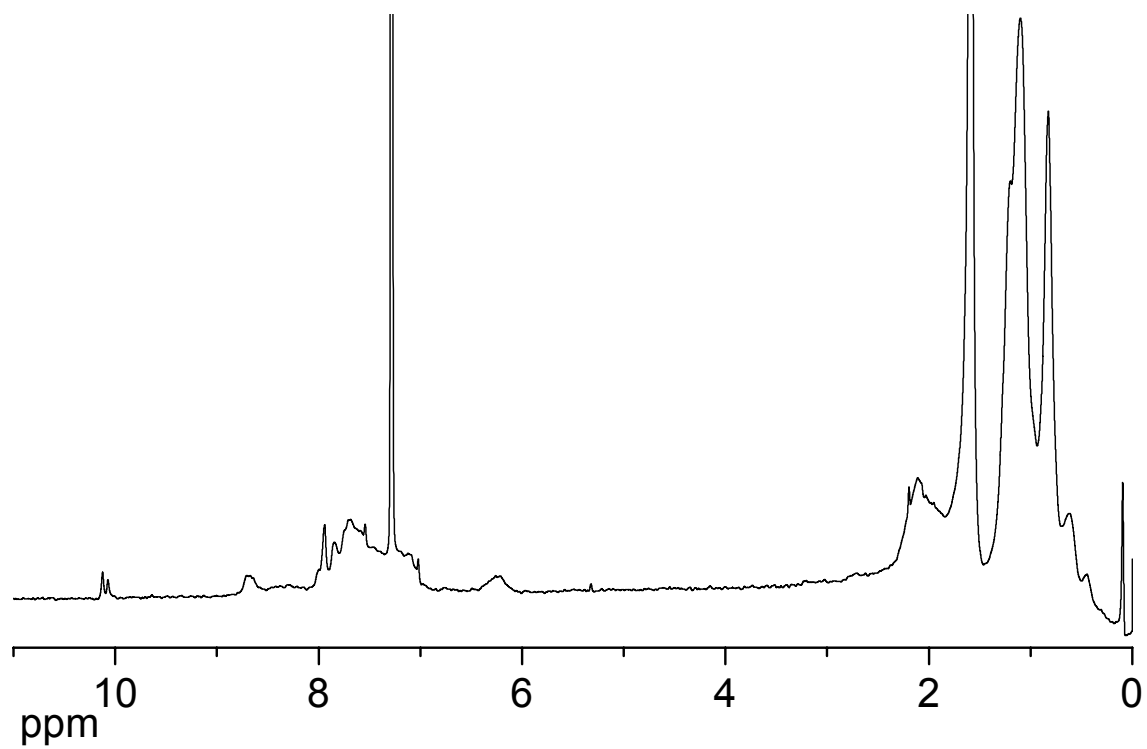

**Figure 1.** <sup>1</sup>H NMR spectrum of **6** in CDCl<sub>3</sub>

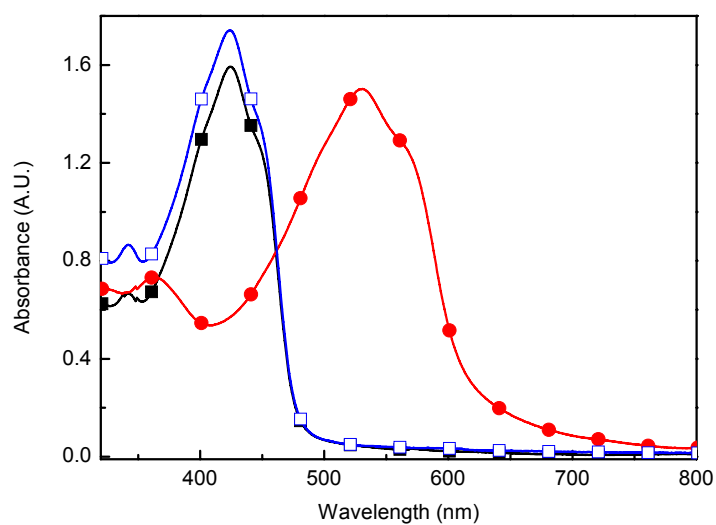

**Figure 2.** Absorbance spectra of **6** (●), oxidized with  $\text{FeCl}_3$  (■), followed by neutralization with hydrazine hydrate (□) in dichloromethane.

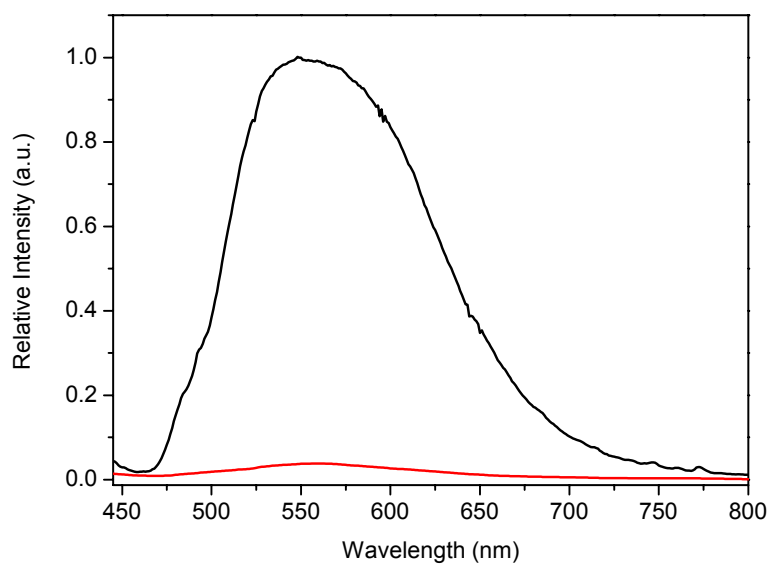

**Figure 3.** Fluorescence spectra of **6** at room temperature (red) and 77 K (black) in 2-methylcyclohexane.

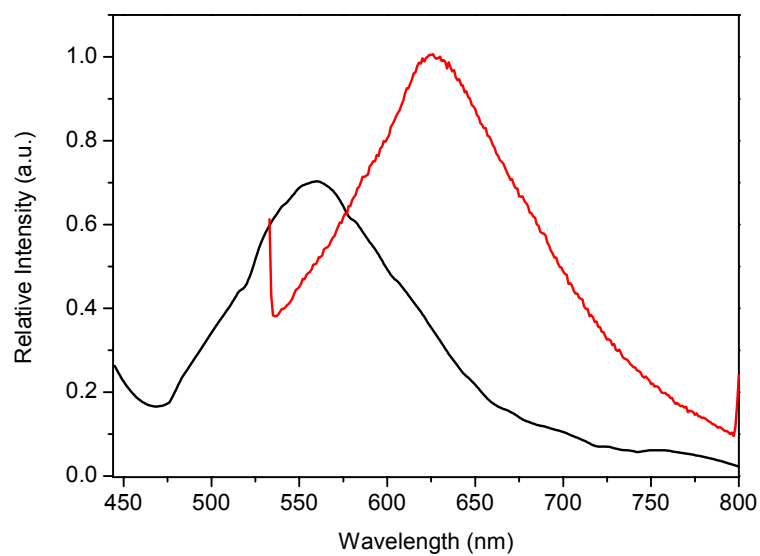

**Figure 4.** Fluorescence spectra of **6** at room temperature (black) and protonated (red) in 2-methylcyclohexane.

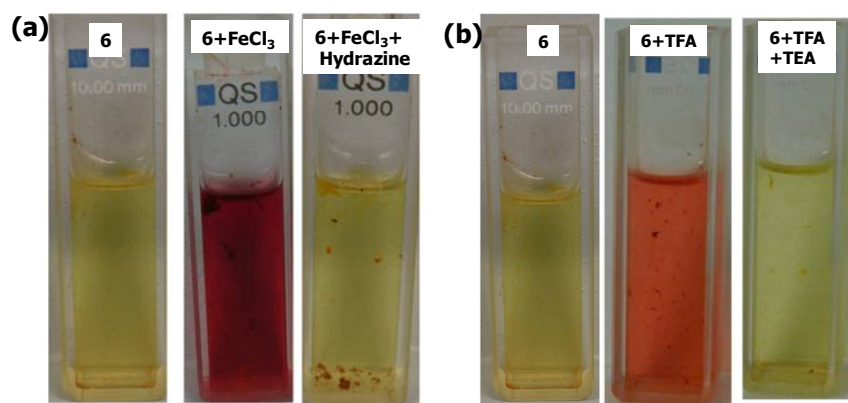

**Figure 5.** Photographs of **6** in dichloromethane (left) with: A) FeCl<sub>3</sub> added (middle) followed by the addition of hydrazine hydrate (right) and B) with the addition of TFA (middle) followed by the addition of TEA (right).
